# Supplementary material
Source: MDPI journal article supplement (https://www.mdpi.com/1996-1073/14/9/2654)
Supplement: s1 [file s1 › energies-1190928-supplementary.pdf]

## Supplementary material

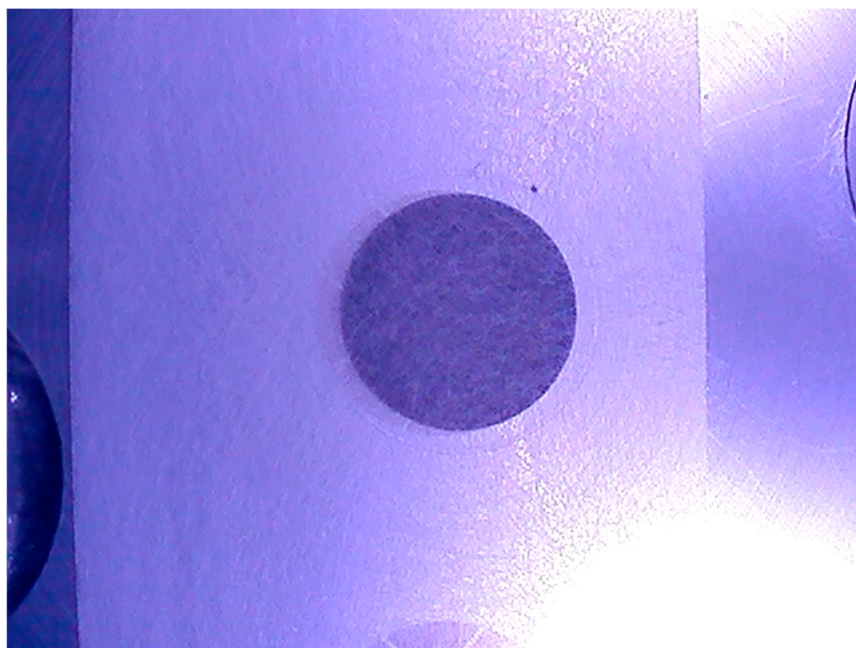

Figure S1. An example of a filter for measurements.

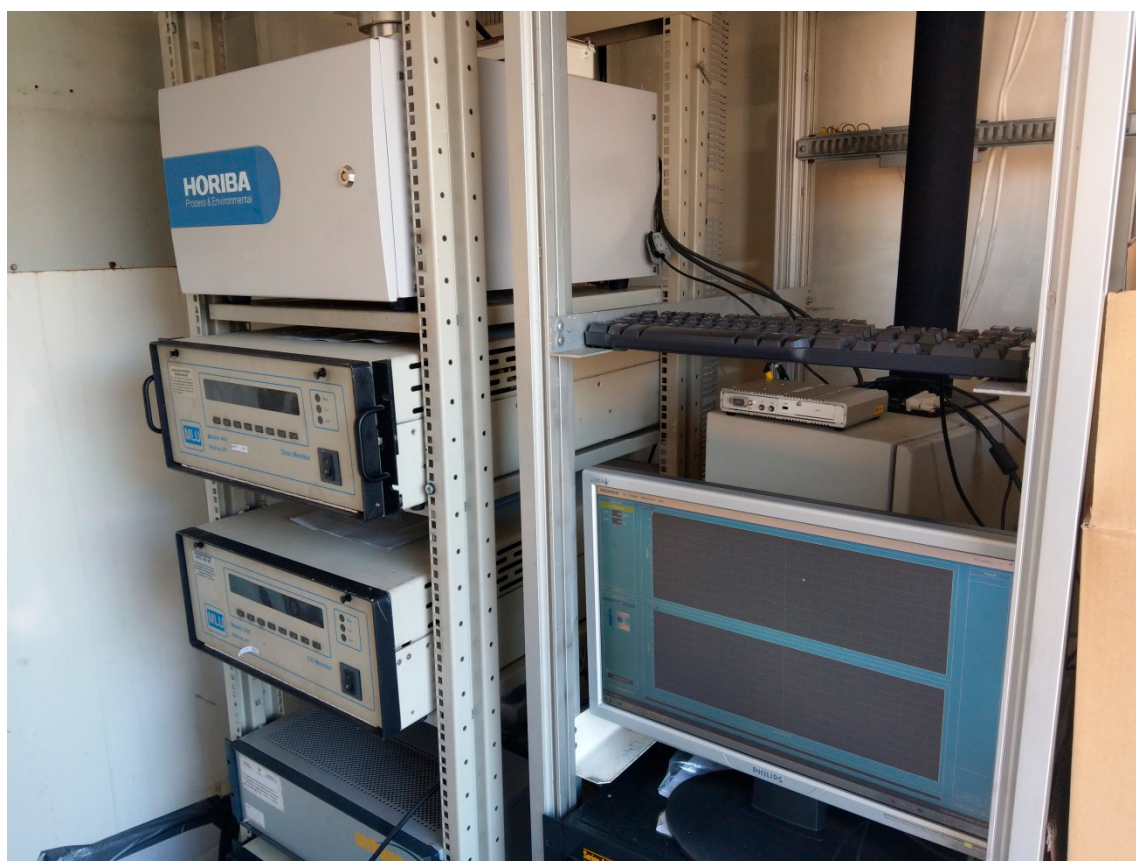

Figure S2. Measuring equipment PX-375 Horiba with other automatic analysers.

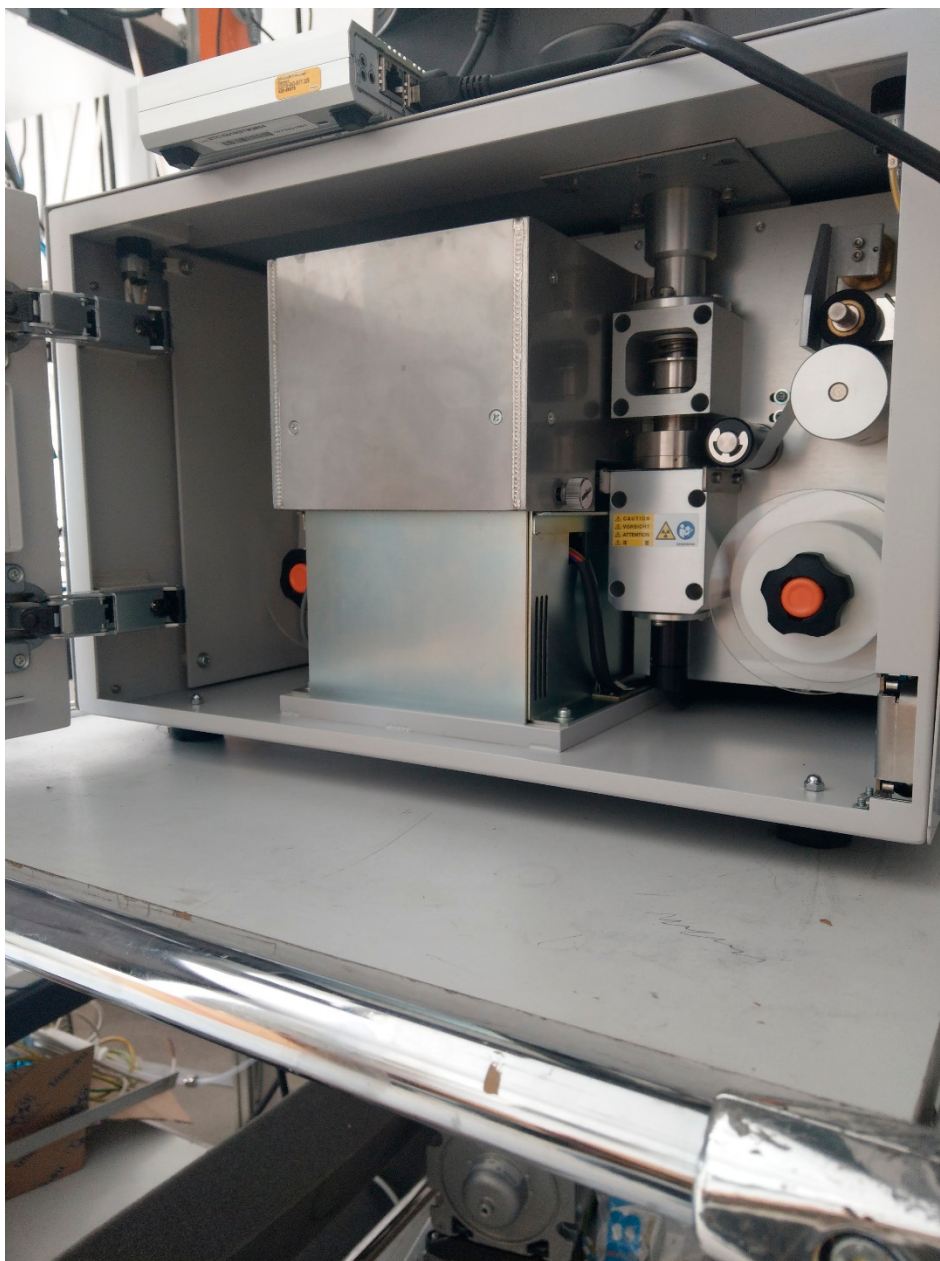

Figure S3. Measuring equipment PX-375 Horiba.

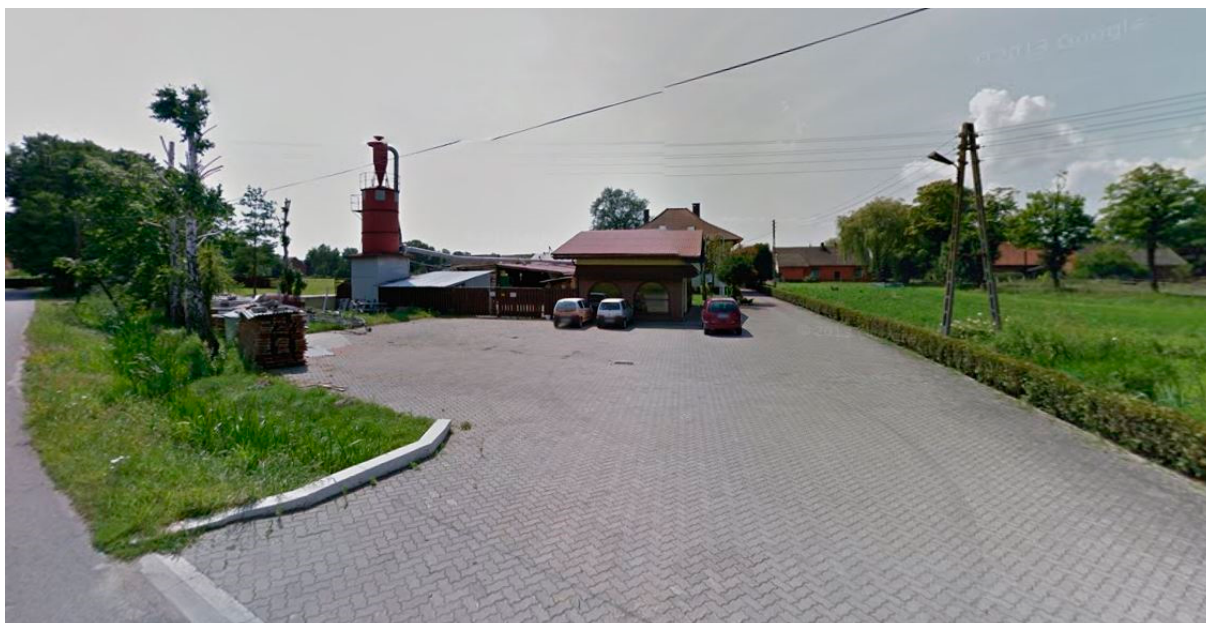

Figure S4. Sampling site in Kotórz Mały.

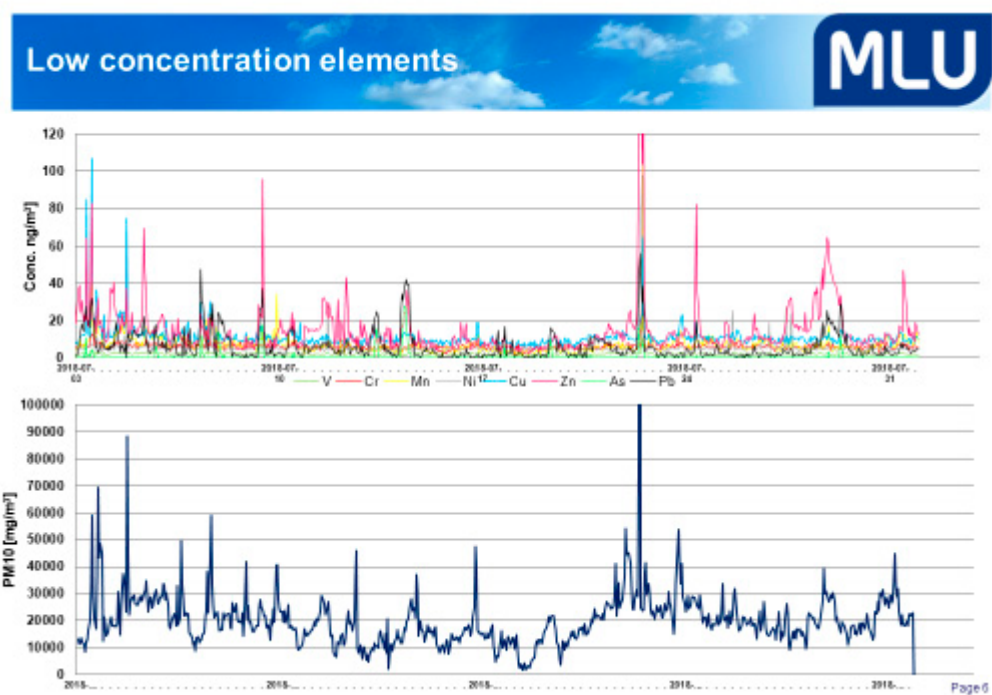

a.

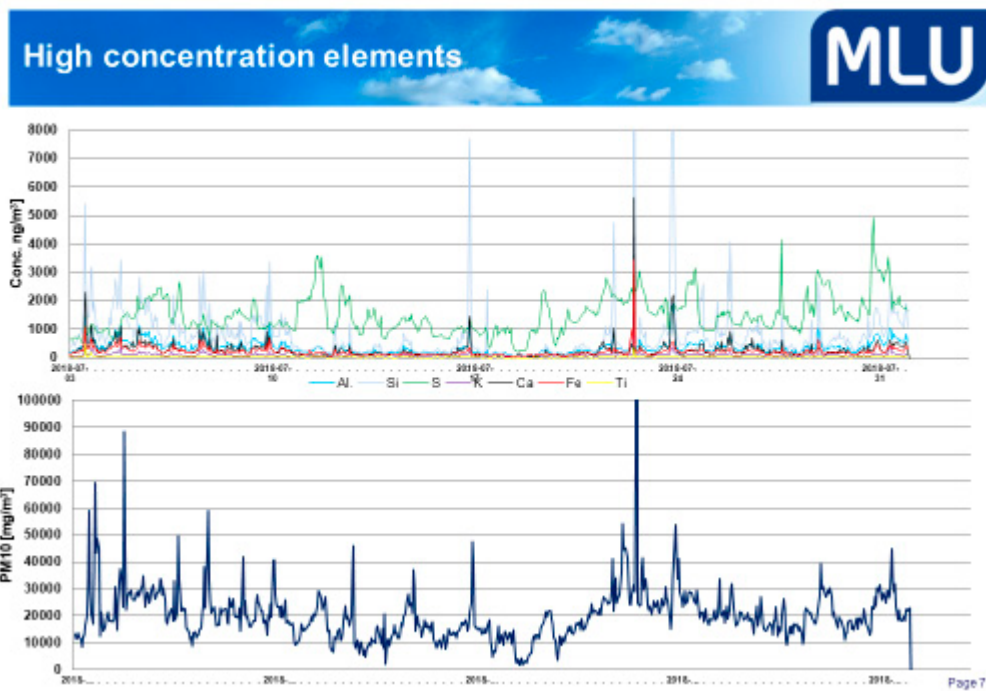

b.

Figure S5a-b. The examples of obtained results. The concentrations of individual elements and PM10.
